# Supplementary material for: Putative extremely high rate of proteome innovation in lancelets might be explained by high rate of gene prediction errors
Source: PubMed Central journal article supplement (PMC4967905; doi:10.1038/srep30700), 2016-08-01
Supplement: srep30700-s1.pdf [file srep30700-s1.pdf]

# **Supplementary File**

**Putative extremely high rate of proteome innovation in lancelets might be explained by high rate of gene prediction errors.**

**László Bányai and László Patthy**

Institute of Enzymology, Research Centre for Natural Sciences, Hungarian Academy of

Sciences, Budapest, P.O. Box 286, H-1519, Hungary,

Corresponding author: László Patthy,

POBox address: Budapest, P.O. Box 286, H-1519, Hungary,

Street address: Budapest, Magyar tudósok körútja 2, H-1117, Hungary

Tel: (361) 382 6751

**Supplementary Table S1. Comparison of the domain architectures of orthologous proteins of *B. belcheri* and *B. floridae*.** One hundred proteins of *B. belcheri*, containing at least two Pfam-A domains, were selected and their *B. floridae* orthologs (if any) were identified by the reciprocal best-hit method using a cut off value of 60% protein sequence identity.<sup>1</sup> Amino acid sequence identity over the aligned region. <sup>2</sup>Domain architecture is defined as the linear sequence of Pfam-A domains. Domains that differ in the domain architectures of orthologs from the two amphioxus species are highlighted in bold underline. The table compares the domain architectures of proteins that have orthologs in the high quality Swiss-Prot database. Entries whose domain architecture is identical with those of orthologs in the Swiss-Prot database are marked with an asterisk\*.

| Sequence ID        |                    | Protein sequence identity (%) <sup>1</sup> | Domain architecture <sup>2</sup>                                                         |                                                                                                                                                                             |
|--------------------|--------------------|--------------------------------------------|------------------------------------------------------------------------------------------|-----------------------------------------------------------------------------------------------------------------------------------------------------------------------------|
| <i>B. belcheri</i> | <i>B. floridae</i> |                                            | <i>B. belcheri</i>                                                                       | <i>B. floridae</i>                                                                                                                                                          |
| 001440_PFF0*       | XP_002598316.1*    | 87                                         | P4Ha_N<br>2OG-FeII_Oxy_3                                                                 | P4Ha_N<br>2OG-FeII_Oxy_3                                                                                                                                                    |
| 002260_PFF0*       | XP_002598117.1*    | 86                                         | Activin_recp<br>Pkinase_Tyr                                                              | Activin_recp<br>Pkinase_Tyr                                                                                                                                                 |
| 003500_PFF0*       | XP_002598733.1*    | 82                                         | CLCA<br>VWA_2                                                                            | CLCA<br>VWA_2                                                                                                                                                               |
| 003850_PFF0*       | XP_002597871.1     | 92                                         | Pep_M12B_propep<br>Reprolysin_5<br><br>Disintegrin                                       | Pep_M12B_propep<br>Reprolysin_5<br><br><b><u>Pep M12B propep</u></b><br>Disintegrin                                                                                         |
| 012350_PFF0*       | XP_002604729.1*    | 80                                         | Kazal_2<br>SPARC_Ca_bdg<br>Thyroglobulin_1                                               | Kazal_2<br>SPARC_Ca_bdg<br>Thyroglobulin_1                                                                                                                                  |
| 017590_PFF0*       | XP_002598432.1*    | 77                                         | Cu-oxidase_3<br>Cu-oxidase<br>Cu-oxidase_2                                               | Cu-oxidase_3<br>Cu-oxidase<br>Cu-oxidase_2                                                                                                                                  |
| 052490_PFF0*       | XP_002608045.1*    | 93                                         | Fz<br>NTR                                                                                | Fz<br>NTR                                                                                                                                                                   |
| 058270_PFF0        | XP_002586055.1     | 72                                         | I-set<br>Fz<br>Kringle                                                                   | I-set<br>Fz<br>Kringle<br><b><u>Fz</u></b><br><b><u>Kringle</u></b><br><b><u>I-set</u></b><br><b><u>Pkinase Tyr</u></b><br><b><u>I-set</u></b><br><b><u>Pkinase Tyr</u></b> |
| 078830_PFF0*       | XP_002596432.1*    | 93                                         | CPSase_L_chain<br>CPSase_L_D2<br>Biotin_carb_C<br>HMGL-like<br>PYC_OADA<br>Biotin_lipoyl | CPSase_L_chain<br>CPSase_L_D2<br>Biotin_carb_C<br>HMGL-like<br>PYC_OADA<br>Biotin_lipoyl                                                                                    |
| 080250_PFF0        | XP_002598506.1     | 94                                         | <b><u>LRR 8</u></b><br><b><u>I-set</u></b><br>Wnt                                        | Wnt                                                                                                                                                                         |

|              |                 |    |                                                                                                                                          |                                                                                                                   |
|--------------|-----------------|----|------------------------------------------------------------------------------------------------------------------------------------------|-------------------------------------------------------------------------------------------------------------------|
| 080250_PFF0  | XP_002598508.1  | 94 | <b><u>LRR_8</u></b><br><b><u>I-set</u></b><br>Wnt                                                                                        | Wnt                                                                                                               |
| 091850_PFF0  | XP_002591393.1  | 75 | Gal_Lectin<br>OLF<br>HRM<br><b><u>GPS</u></b><br>GAIN<br>7tm_2                                                                           | Gal_Lectin<br>OLF<br>HRM<br>GAIN<br>7tm_2                                                                         |
| 102470_PFF0* | XP_002608336.1  | 98 | RNA_pol_Rpb2_1<br>RNA_pol_Rpb2_2<br>RNA_pol_Rpb2_3<br>RNA_pol_Rpb2_4<br>RNA_pol_Rpb2_5<br>RNA_pol_Rpb2_6<br><b><u>RNA_pol_Rpb2_7</u></b> | RNA_pol_Rpb2_1<br>RNA_pol_Rpb2_2<br>RNA_pol_Rpb2_3<br>RNA_pol_Rpb2_4<br>RNA_pol_Rpb2_5<br>RNA_pol_Rpb2_6          |
| 103400_PFF0  | XP_002593834.1* | 91 | <b>Ank_3</b><br><b>Ank_2</b><br><b>Ank_4</b><br>Ank_2<br>Arm<br><b>Arm</b>                                                               | Arm<br>Arm                                                                                                        |
| 114280_PFF0  | XP_002608942.1  | 89 | C2<br>C2<br>FerI<br>C2<br>FerB<br>C2<br>C2<br>C2<br>C2<br>C2<br>Ferlin_C                                                                 | C2<br>C2<br>FerI<br>C2<br>FerB<br>C2<br>C2<br>C2<br>C2<br>C2<br>Ferlin_C                                          |
| 117350_PFF0* | XP_002599461.1* | 89 | TGFb_propeptide<br>TGF_beta                                                                                                              | TGFb_propeptide<br>TGF_beta                                                                                       |
| 118940_PFF0* | XP_002587581.1* | 86 | HAD_2<br>APH<br>Acyl-CoA_dh_N<br>Acyl-CoA_dh_M<br>Acyl-CoA_dh_1                                                                          | HAD_2<br>APH<br>Acyl-CoA_dh_N<br>Acyl-CoA_dh_M<br>Acyl-CoA_dh_1                                                   |
| 123650_PFF0* | XP_002603715.1  | 95 | CAP_GLY<br><b><u>Dynactin</u></b>                                                                                                        | CAP_GLY                                                                                                           |
| 123650_PFF0* | XP_002603716.1  | 93 | <b><u>CAP_GLY</u></b><br>Dynactin                                                                                                        | Dynactin                                                                                                          |
| 127590_PFF0  | XP_002614044.1* | 86 | Kazal_2<br>Kazal_2<br>Kazal_2<br>SEA<br>Kazal_2<br>Kazal_2<br>Kazal_2<br>Kazal_2<br>Kazal_2<br>Kazal_1<br>Kazal_1                        | Kazal_2<br>Kazal_2<br>Kazal_2<br>SEA<br>Kazal_2<br>Kazal_2<br>Kazal_2<br>Kazal_2<br>Kazal_2<br>Kazal_1<br>Kazal_1 |

|              |                 |    |                                                                            |                                                                                                                                                                                                                                                                                     |
|--------------|-----------------|----|----------------------------------------------------------------------------|-------------------------------------------------------------------------------------------------------------------------------------------------------------------------------------------------------------------------------------------------------------------------------------|
|              |                 |    | Laminin_EGF<br>Laminin_EGF                                                 | Laminin_EGF<br>Laminin_EGF<br><b><u>Kazal 2</u></b><br><b><u>EGF</u></b><br><b><u>Laminin G 1</u></b><br><b><u>Laminin G 1</u></b><br><b><u>EGF</u></b><br><b><u>Laminin G 1</u></b>                                                                                                |
| 127600_PFF0  | XP_002614044.1* | 90 |                                                                            | <b><u>Kazal 2</u></b><br><b><u>Kazal 2</u></b><br><b><u>Kazal 2</u></b><br><b><u>SEA</u></b><br><b><u>Kazal 2</u></b><br><b><u>Kazal 2</u></b><br><b><u>Kazal 2</u></b><br><b><u>Kazal 1</u></b><br><b><u>Kazal 1</u></b><br><b><u>Laminin EGF</u></b><br><b><u>Laminin EGF</u></b> |
|              |                 |    | Kazal_2<br>EGF<br>Laminin_G_1<br>Laminin_G_1<br>EGF<br>Laminin_G_1         | Kazal_2<br>EGF<br>Laminin_G_1<br>Laminin_G_1<br>EGF<br>Laminin_G_1                                                                                                                                                                                                                  |
| 128050_PFF0  | XP_002603923.1  | 71 | TSP_1<br><br>Ldl_recept_a<br>MACPF<br>TSP_1<br>GCC2_GCC3                   | TSP_1<br><b><u>TSP 1</u></b><br>Ldl_recept_a<br>MACPF<br>TSP_1<br>GCC2_GCC3                                                                                                                                                                                                         |
| 133320_PFF0  | XP_002610402.1  | 91 | SRCR<br>Kringle<br>SRCR<br>Trypsin                                         | SRCR<br>Kringle<br>SRCR<br>Trypsin                                                                                                                                                                                                                                                  |
| 135460_PFF0* | XP_002605157.1* | 85 | Fz<br>Frizzled                                                             | Fz<br>Frizzled                                                                                                                                                                                                                                                                      |
| 144220_PFF0  | XP_002591459.1  | 92 | RICTOR_N<br>RICTOR_M<br>RasGEF_N_2<br>RICTOR_V                             | RICTOR_N<br>RICTOR_M<br>RasGEF_N_2<br>RICTOR_V                                                                                                                                                                                                                                      |
| 152200_PFF0* | –               |    | FHA<br>CEP170_C                                                            |                                                                                                                                                                                                                                                                                     |
| 153460_PFF0* | –               |    | Ank_2<br>Ank_2<br>Ank_2<br>Ion_trans                                       |                                                                                                                                                                                                                                                                                     |
| 157010_PFF0* | XP_002611039.1  | 87 | EF-hand_7<br>Ferric_reduct<br><b><u>FAD binding 8</u></b><br>NAD_binding_6 | EF-hand_7<br>Ferric_reduct<br><b><u>NAD_binding_6</u></b>                                                                                                                                                                                                                           |

|              |                 |    |                                                                                                                                       |                                                    |
|--------------|-----------------|----|---------------------------------------------------------------------------------------------------------------------------------------|----------------------------------------------------|
| 157070_PFF0* | XP_002611055.1* | 95 | ANAPC10<br>HECT                                                                                                                       | ANAPC10<br>HECT                                    |
| 157720_PFF0  | XP_002612291.1  | 90 | HYR<br>GCC2_GCC3                                                                                                                      | <b><u>Troponin</u></b><br>HYR<br>GCC2_GCC3         |
| 158710_PFF0  | XP_002600118.1  | 95 | tRNA-synt_1<br>Anticodon_1<br>Val_tRNA-synt_C                                                                                         | tRNA-synt_1<br>Anticodon_1<br>Val_tRNA-synt_C      |
| 158830_PFF0* | XP_002600149.1* | 83 | IGFBP<br>VWC<br>TSP_1                                                                                                                 | IGFBP<br>VWC<br>TSP_1                              |
| 160400_PFF0  | XP_002601973.1  | 93 | Integrin_beta<br>Integrin_B_tail<br>Integrin_b_cyt                                                                                    | Integrin_beta<br>Integrin_B_tail<br>Integrin_b_cyt |
| 161590_PFF0  | XP_002592408.1  | 98 | <b><u>FERM_M</u></b><br><b><u>IRS</u></b><br><b><u>Talin_middle</u></b><br><b><u>I_LWEQ</u></b><br><b><u>VBS</u></b><br>VBS<br>I_LWEQ | VBS<br>I_LWEQ                                      |
| 161590_PFF0  | XP_002592411.1  | 92 | FERM_M<br>IRS<br>Talin_middle<br><b><u>I_LWEQ</u></b><br><b><u>VBS</u></b><br><b><u>VBS</u></b><br><b><u>I_LWEQ</u></b>               | FERM_M<br>IRS<br>Talin_middle                      |
| 161590_PFF0  | XP_002592410.1  | 92 | <b><u>FERM_M</u></b><br><b><u>IRS</u></b><br><b><u>Talin_middle</u></b><br>I_LWEQ<br>VBS<br><b><u>VBS</u></b><br><b><u>I_LWEQ</u></b> | I_LWEQ<br>VBS                                      |
| 172520_PRF0* | XP_002611318.1* | 97 | Fz<br>NTR                                                                                                                             | Fz<br>NTR                                          |
| 185920_PRF0  | XP_002606276.1* | 92 | An_peroxidase<br>EGF_CA                                                                                                               | An_peroxidase<br><b><u>Sushi</u></b><br>EGF_CA     |
| 186040_PRF0* | XP_002606276.1* | 91 | An_peroxidase<br>Sushi<br>EGF_CA                                                                                                      | An_peroxidase<br>Sushi<br>EGF_CA                   |
| 189350_PRF0* | XP_002596820.1  | 99 | FbpA<br><b><u>DUF814</u></b><br><b><u>DUF3441</u></b>                                                                                 | FbpA                                               |

|              |                 |    |                                                                                                |                                                                                                                                                                 |
|--------------|-----------------|----|------------------------------------------------------------------------------------------------|-----------------------------------------------------------------------------------------------------------------------------------------------------------------|
| 189350_PRFO* | XP_002596821.1  | 80 | <b><u>FbpA</u></b><br>DUF814<br>DUF3441                                                        | DUF814<br>DUF3441                                                                                                                                               |
| 192660_PRFO* | XP_002586029*   | 95 | ThiF<br>E1_FCCH<br>E1_4HB<br>ThiF<br>UBA_e1_thiolCys<br>E1_UFD                                 | ThiF<br>E1_FCCH<br>E1_4HB<br>ThiF<br>UBA_e1_thiolCys<br>E1_UFD                                                                                                  |
| 196330_PRFO  | XP_002594642.1* | 86 | Ion_trans<br>Ion_trans<br><b><u>Ion_trans</u></b><br><b><u>Ion_trans</u></b>                   | Ion_trans<br>Ion_trans                                                                                                                                          |
| 207610_PRFO* | XP_002610947.1* | 88 | TGFb_propeptide<br>TGF_beta                                                                    | TGFb_propeptide<br>TGF_beta                                                                                                                                     |
| 208940_PRFO* | XP_002607923.1  | 95 | <b><u>ANF_receptor</u></b><br>Pkinase_Tyr<br>Guanylate_cyc                                     | Pkinase_Tyr<br>Guanylate_cyc                                                                                                                                    |
| 209230_PRFO  | XP_002610589.1* | 88 | Neur_chan_LBD<br>Neur_chan_memb<br><b><u>Neur_chan_LBD</u></b><br><b><u>Neur_chan_memb</u></b> | Neur_chan_LBD<br>Neur_chan_memb                                                                                                                                 |
| 211270_PRFO* | XP_002591619.1* | 88 | BAR_3<br>PH<br>ArfGap<br>Ank_2                                                                 | BAR_3<br>PH<br>ArfGap<br>Ank_2                                                                                                                                  |
| 215230_PRFO* | XP_002589217.1* | 88 | PMT<br>MIR<br>PMT_4TMC                                                                         | PMT<br>MIR<br>PMT_4TMC                                                                                                                                          |
| 215230_PRFO* | XP_002589229.1* | 90 | PMT<br>MIR<br>PMT_4TMC                                                                         | PMT<br>MIR<br>PMT_4TMC                                                                                                                                          |
| 222490_PRFO* | XP_002598311.1  | 97 | <b><u>DMAP_binding</u></b><br>DNMT1-RFD<br>zf-CXXC<br>BAH<br>BAH<br>DNA_methylase              | DNMT1-RFD<br>zf-CXXC<br>BAH<br>BAH<br>DNA_methylase                                                                                                             |
| 223320_PRFO  | XP_002601301.1  | 79 | Pep_M12B_propep<br>Reprolysin<br>TSP_1<br>ADAM_spacer1<br>TSP_1<br>TSP_1<br>TSP_1<br>TSP_1     | Pep_M12B_propep<br>Reprolysin<br>TSP_1<br>ADAM_spacer1<br>TSP_1<br>TSP_1<br>TSP_1<br>TSP_1<br><b><u>TSP_1</u></b><br><b><u>TSP_1</u></b><br><b><u>TSP_1</u></b> |
| 227800_PRFO  | XP_002608349.1  | 63 | SRCR                                                                                           | SRCR                                                                                                                                                            |

|              |                 |    |                                                                                            |                                                                                                            |
|--------------|-----------------|----|--------------------------------------------------------------------------------------------|------------------------------------------------------------------------------------------------------------|
|              |                 |    | SRCR<br>SRCR<br>Lysyl_oxidase                                                              | SRCR<br>SRCR<br>Lysyl_oxidase<br><b>SRCR</b><br><b><u>Lysyl_oxidase</u></b><br><b><u>Lysyl_oxidase</u></b> |
| 237250_PRFO  | XP_002612866.1  | 91 |                                                                                            | <b><u>ANATO</u></b><br><b><u>A2M</u></b><br><b><u>Thiol-ester_cl</u></b><br><b><u>A2M_comp</u></b>         |
|              |                 |    | A2M_recep<br>NTR                                                                           | A2M_recep<br>NTR                                                                                           |
| 237260_PRFO  | XP_002612866.1  | 90 | <b>A2M_N</b><br><b>A2M_N_2</b><br>ANATO<br>A2M<br>Thiol-ester_cl<br>A2M_comp               | ANATO<br>A2M<br>Thiol-ester_cl<br>A2M_comp<br><b>A2M_recep</b><br><b>NTR</b>                               |
| 237260_PRFO  | AF391289_5      | 92 | A2M_N<br>A2M_N_2<br>ANATO<br>A2M<br><b><u>Thiol-ester_cl</u></b><br><b><u>A2M_comp</u></b> | A2M_N<br>A2M_N_2<br>ANATO<br>A2M                                                                           |
| 246010_PRFO* | XP_002613969.1* | 72 | PG_binding_1<br>Peptidase_M10<br>Hemopexin<br>Hemopexin<br>Hemopexin<br>Hemopexin          | PG_binding_1<br>Peptidase_M10<br>Hemopexin<br>Hemopexin<br>Hemopexin<br>Hemopexin                          |
| 247370_PRFO* | --              |    | WIF<br>Pkinase_Tyr                                                                         |                                                                                                            |
| 248080_PRFO  | XP_002591824.1* | 92 | <b><u>EGF_3</u></b><br>Sushi<br>Sushi<br>VWA<br>Trypsin                                    | Sushi<br>Sushi<br>VWA<br>Trypsin                                                                           |
| 253950_PRFO* | XP_002610496.1* | 97 | Histone<br>RhoGEF<br>PH<br>RasGEF_N<br>RasGEF                                              | Histone<br>RhoGEF<br>PH<br>RasGEF_N<br>RasGEF                                                              |
| 253960_PRFO* | XP_002610495.1* | 96 | zf-Sec23_Sec24<br>Sec23_trunk<br>Sec23_BS<br>Sec23_helical<br>Gelsolin                     | zf-Sec23_Sec24<br>Sec23_trunk<br>Sec23_BS<br>Sec23_helical<br>Gelsolin                                     |
| 254170_PRFO* | XP_002595526.1* | 87 | ABC_membrane<br>ABC_tran<br>ABC_membrane                                                   | ABC_membrane<br>ABC_tran<br>ABC_membrane                                                                   |

|              |                 |     |                                                                                      |                                                                                                 |
|--------------|-----------------|-----|--------------------------------------------------------------------------------------|-------------------------------------------------------------------------------------------------|
|              |                 |     | ABC_tran                                                                             | ABC_tran                                                                                        |
| 256530_PRF0  | B6MUN4.1        | 64  | <b><u>Myb DNA-binding</u></b><br>SWIRM                                               | SWIRM<br><b><u>JAB</u></b>                                                                      |
| 256520_PRF0  | B6MUN4.1        | 76  | JAB                                                                                  | <b><u>SWIRM</u></b><br>JAB                                                                      |
| 257610_PRF0* | XP_002587133.1* | 84  | EST1<br>EST1_DNA_bind<br>EST1_DNA_bind<br>PIN_4                                      | EST1<br>EST1_DNA_bind<br>EST1_DNA_bind<br>PIN_4                                                 |
| 258810_PRF0  | XP_002605408.1* | 60  | Glyco_transf_29<br><b><u>Glyco transf 29</u></b>                                     | Glyco_transf_29                                                                                 |
| 258870_PRF0* | XP_002595259.1  | 98  | <b><u>STAT_int</u></b><br>STAT_alpha<br>STAT_bind<br>SH2                             | STAT_alpha<br>STAT_bind<br>SH2                                                                  |
| 258870_PRF0* | XP_002585719.1  | 92  | STAT_int<br><b><u>STAT_alpha</u></b><br><b><u>STAT_bind</u></b><br><b><u>SH2</u></b> | STAT_int                                                                                        |
| 258870_PRF0* | XP_002595260.1  | 100 | <b><u>STAT_int</u></b><br><b><u>STAT_alpha</u></b><br>STAT_bind<br><b><u>SH2</u></b> | STAT_bind                                                                                       |
| 258870_PRF0* | XP_002595256.1  | 96  | <b><u>STAT_int</u></b><br><b><u>STAT_alpha</u></b><br>STAT_bind<br>SH2               | STAT_bind<br>SH2                                                                                |
| 259020_PRF0* | XP_002600999.1* | 97  | GRAM<br>GRAM<br>RabGAP-TBC                                                           | GRAM<br>GRAM<br>RabGAP-TBC                                                                      |
| 272770_PRF0* | XP_002601715.1* | 90  | AAA_11<br>AAA_11<br>AAA_12                                                           | AAA_11<br>AAA_11<br>AAA_12                                                                      |
| 283240_PRF0  | CAA06854.1      | 95  | Reeler<br>Spond_N<br>fn3<br>TSP_1<br>fn3<br>TSP_1<br>TSP_1                           | Reeler<br>Spond_N<br>fn3<br>TSP_1<br>fn3<br>TSP_1<br>TSP_1                                      |
| 293630_PRF0* | XP_002613483.1* | 92  | Chorein_N<br>ATG_C                                                                   | Chorein_N<br>ATG_C                                                                              |
| 293740_PRF0  | XP_002613924.1  | 92  | <b><u>SHR-BD</u></b>                                                                 | <b><u>VPS13</u></b><br><b><u>VPS13 mid rpt</u></b><br><b><u>UBA</u></b><br><b><u>SHR-BD</u></b> |



|              |                   |    | <u>VPS13_C</u>                                                                        | <u>VPS13_C</u>                                                                 |
|--------------|-------------------|----|---------------------------------------------------------------------------------------|--------------------------------------------------------------------------------|
| 209920_PRM0  | XP_002613924.1    | 89 | UBA                                                                                   | <u>VPS13</u><br><u>VPS13_mid_rpt</u><br>UBA<br><u>SHR-BD</u><br><u>VPS13_C</u> |
| 209930_PRF0  | XP_002613924.1    | 81 |                                                                                       | <u>VPS13</u><br><u>VPS13_mid_rpt</u><br>UBA<br><u>SHR-BD</u><br><u>VPS13_C</u> |
| 209940_PRF0  | XP_002613924.1    | 86 | <u>Chorein_N</u><br>VPS13<br>VPS13_mid_rpt                                            | VPS13<br>VPS13_mid_rpt<br><u>UBA</u><br><u>SHR-BD</u><br><u>VPS13_C</u>        |
| 209940_PRF0  | XP_002613923.1    | 94 | Chorein_N<br><u>VPS13</u><br><u>VPS13_mid_rpt</u>                                     | Chorein_N                                                                      |
| 321850_PRF0* | XP_002585883.1*   | 85 | ANF_receptor<br>Lig_chan-Glu_bd<br>Lig_chan                                           | ANF_receptor<br>Lig_chan-Glu_bd<br>Lig_chan                                    |
| 319230_PRF0* | XP_002600703.1    | 77 | cNMP_binding<br>DEP<br>cNMP_binding<br><b>RasGEF_N</b><br><b>RasGEF</b>               | cNMP_binding<br>DEP<br>cNMP_binding                                            |
| 319230_PRF0* | XP_002600702.1    | 95 | <b>cNMP_binding</b><br><b>DEP</b><br><b>cNMP_binding</b><br><b>RasGEF_N</b><br>RasGEF | RasGEF                                                                         |
| 325460_PRF0  | XP_002608790.1*   | 88 | FG-GAP<br>FG-GAP<br>Integrin_alpha2                                                   | FG-GAP<br>FG-GAP<br>Integrin_alpha2<br>Integrin_alpha                          |
| 320370_PRF0  | XP_002594515.1    | 72 | <u>zf-RING_5</u><br>zf-B_box<br>fn3<br><u>SPRY</u>                                    | <u>zf-C3HC4_3</u><br>zf-B_box<br>fn3                                           |
| 325780_PRF0* | XP_002602117.191* | 91 | Glycos_transf_2<br>Ricin_B_lectin                                                     | Glycos_transf_2<br>Ricin_B_lectin                                              |
| 328450_PRF0  | XP_002607180.1*   | 79 | Kunitz_BPTI<br>NTR                                                                    | <u>WAP</u><br><u>Kazal_2</u><br><u>Kunitz_BPTI</u><br>Kunitz_BPTI<br>NTR       |

|              |                 |    |                                                                                                              |                                                                                                                      |
|--------------|-----------------|----|--------------------------------------------------------------------------------------------------------------|----------------------------------------------------------------------------------------------------------------------|
| 328460_PRFO  | XP_002607180.1* | 85 | WAP<br>Kazal_2<br>Kunitz_BPTI<br>Kunitz_BPTI                                                                 | WAP<br>Kazal_2<br>Kunitz_BPTI<br>Kunitz_BPTI<br><b><u>NTR</u></b>                                                    |
| 328470_PRFO  | XP_002607185.1  | 96 | ABC_membrane<br>ABC_tran<br>ABC_membrane<br>ABC_tran<br>ABC_membrane<br>ABC_tran<br>ABC_membrane<br>ABC_tran | ABC_membrane<br>ABC_tran<br>ABC_membrane<br>ABC_membrane<br>ABC_membrane<br>ABC_membrane<br>ABC_membrane<br>ABC_tran |
| 328810_PRFO  | XP_002592166.1  | 91 | zf-HC5HC2H<br>FYRN<br>FYRC<br>SET                                                                            | zf-HC5HC2H<br>FYRN<br>FYRC<br>SET                                                                                    |
| 328940_PRFO  | XP_002612925.1  | 90 | <b><u>dsrm</u></b><br><b><u>dsrm</u></b><br>A_deamin<br><b><u>A deamin</u></b>                               | A_deamin                                                                                                             |
| 328940_PRFO  | XP_002612924.1  | 99 | dsrm<br>dsrm<br><b><u>A deamin</u></b><br><b><u>A deamin</u></b>                                             | dsrm<br>dsrm                                                                                                         |
| 329040_PRFO* | XP_002612907.1* | 82 | Flavodoxin_1<br>FAD_binding_1<br>NAD_binding_1                                                               | Flavodoxin_1<br>FAD_binding_1<br>NAD_binding_1                                                                       |
| 329370_PRFO* | XP_002611195.1  | 70 | PLAT<br>Lipoxygenase                                                                                         | <b><u>Catalase</u></b><br>PLAT<br>Lipoxygenase                                                                       |
| 329970_PRFO  | XP_002606233.1  | 92 | DAG_kinase_N<br>C1_1<br>C1_1<br>DAGK_cat<br>DAGK_acc                                                         | DAG_kinase_N<br>C1_1<br>C1_1<br>DAGK_cat<br>DAGK_acc                                                                 |
| 330040_PRFO* | –               |    | Activin_recp<br>Pkinase                                                                                      |                                                                                                                      |
| 330210_PRFO* | XP_002602990.1  | 98 | EF-hand<br>Mito_carr<br>Mito_carr<br>Mito_carr                                                               | EF-hand<br>Mito_carr<br>Mito_carr<br>Mito_carr<br><b><u>Peptidase M2</u></b>                                         |

---

**Supplementary Table S2. Comparison of the domain architectures of orthologous proteins of *B. belcheri* and *B. floridae*.** One hundred proteins of *B. belcheri*, containing at least two Pfam-A domains, were selected and their *B. floridae* orthologs (if any) were identified by the reciprocal best-hit method using a cut off value of 60% protein sequence identity. <sup>1</sup>Amino acid sequence identity over the aligned region. <sup>2</sup>Domain architecture is defined as the linear sequence of Pfam-A domains. Domains that differ in the domain architectures of orthologs from the two amphioxus species are highlighted in bold underline. The table compares the domain architectures of proteins that have no orthologs in the high quality Swiss-Prot database.

| Sequence ID        |                    | Protein sequence identity (%) <sup>1</sup> | Domain architecture <sup>2</sup>                                                        |                                               |
|--------------------|--------------------|--------------------------------------------|-----------------------------------------------------------------------------------------|-----------------------------------------------|
| <i>B. belcheri</i> | <i>B. floridae</i> |                                            | <i>B. belcheri</i>                                                                      | <i>B. floridae</i>                            |
| 000200_PFF0        | AAN62850.1         | 85                                         | V-set<br>CBM_14                                                                         | V-set<br>CBM_14                               |
| 001280_PFF0        | XP_002608265.1     | 88                                         | CBM_14<br>ILEI                                                                          | CBM_14<br>ILEI                                |
| 017700_PFF0        | XP_002598460.1     | 85                                         | Gal_Lectin<br>Gal_Lectin<br>GPS<br>7tm_2                                                | Gal_Lectin<br>Gal_Lectin<br>GPS<br>7tm_2      |
| 018300_PFF0        | XP_002588697.1     | 68                                         | Lectin_C<br>fn2<br>fn2<br>fn2<br>fn2<br>fn2                                             | Lectin_C<br>fn2<br>fn2<br>fn2<br>fn2<br>fn2   |
| 040970_PFF0        | XP_002596007.1     | 95                                         | kringle<br>kringle<br>trypsin                                                           | kringle<br>kringle<br>trypsin                 |
| 068220_PFF0        | XP_002586877.1     | 79                                         | fn2<br>fn2<br>fn2<br>fn2<br>CUB<br>CUB                                                  | fn2<br>fn2<br>fn2<br>fn2<br>CUB<br>CUB        |
| 080050_PFF0        | XP_002606926.1     | 92                                         | N-glycanase_N<br>N-glycanase_C                                                          | N-glycanase_N<br>N-glycanase_C                |
| 124390_PFF0        | –                  |                                            | cEGF<br>FXa_inhibition<br>EGF_CA<br>EGF_CA<br>NIDO<br>EGF_CA<br>EGF_CA<br>SEA<br>EGF_CA |                                               |
| 159900_PFF0        | XP_002600642.1     | 82                                         | AAA_8<br>MT<br>AAA_9<br><br>Dynein_heavy                                                | AAA_8<br>MT<br>AAA_9<br>AAA_9<br>Dynein_heavy |

|             |                |    |                                                                                                                                                                                                       |                                                        |
|-------------|----------------|----|-------------------------------------------------------------------------------------------------------------------------------------------------------------------------------------------------------|--------------------------------------------------------|
| 167280_PRFO | XP_002611740.1 | 66 | Kringle<br>Somatomedin_B<br>7tm_2                                                                                                                                                                     | Lectin_C<br>Kringle<br>Somatomedin_B<br>7tm_2          |
| 173360_PRFO | XP_002593467.1 | 92 | Astacin<br>kringle                                                                                                                                                                                    | Astacin<br>kringle                                     |
| 180420_PRFO | XP_002609978.1 | 90 | Somatomedin_B<br>7tm_2                                                                                                                                                                                | <b><u>5-FTHF_cyc-lig</u></b><br>Somatomedin_B<br>7tm_2 |
| 184730_PRFO | XP_002597992.1 | 65 | Ldl_recept_a<br>Kringle<br>Kringle<br>7tm_2                                                                                                                                                           | Ldl_recept_a<br>Kringle<br>Kringle<br>7tm_2            |
| 188610_PRFO | XP_002609579.1 | 86 | ASC<br>F5_F8_type_C<br>F5_F8_type_C<br>Kringle<br>ASC                                                                                                                                                 | ASC<br>F5_F8_type_C<br>F5_F8_type_C<br>Kringle<br>ASC  |
| 196740_PRFO | XP_002601342.1 | 89 | <b><u>Fibrinogen_C</u></b><br><b><u>Fibrinogen_C</u></b><br><b><u>I-set</u></b><br><b><u>fn3</u></b><br><b><u>fn3</u></b><br><b><u>fn3</u></b><br><b><u>fn3</u></b><br>Y_phosphatase<br>Y_phosphatase | Y_phosphatase<br>Y_phosphatase                         |
| 196740_PRFO | XP_002601345.1 | 78 | Fibrinogen_C<br>Fibrinogen_C<br><b><u>I-set</u></b><br><b><u>fn3</u></b><br><b><u>fn3</u></b><br><b><u>fn3</u></b><br><b><u>fn3</u></b><br><b><u>Y_phosphatase</u></b><br><b><u>Y_phosphatase</u></b> | Fibrinogen_C<br>Fibrinogen_C<br><br>fn3                |
| 200810_PRFO | XP_002608508.1 | 75 | Astacin<br>CUB<br>MAM                                                                                                                                                                                 | Astacin<br>CUB<br>MAM                                  |
| 258300_PRFO | XP_002605710.1 | 90 | <b><u>Ldl_recept_a</u></b><br><b><u>SRCR</u></b><br><b><u>Ldl_recept_a</u></b><br>Trypsin                                                                                                             | Trypsin                                                |
| 258300_PRFO | XP_002605711.1 | 90 | <b><u>Ldl_recept_a</u></b><br>SRCR<br><b><u>Ldl_recept_a</u></b><br><b><u>Trypsin</u></b>                                                                                                             | SRCR                                                   |
| 260260_PRFO | –              |    | BACK<br>Kelch_1                                                                                                                                                                                       |                                                        |
| 269420_PRFO | XP_002605854.1 | 73 | CUB                                                                                                                                                                                                   | CUB                                                    |

|             |                |    |                                                                                         |                                                                |
|-------------|----------------|----|-----------------------------------------------------------------------------------------|----------------------------------------------------------------|
|             |                |    | Ldl_recept_a<br>Fz<br>Kringle<br>Neur_chan_memb                                         | Ldl_recept_a<br>Fz<br>Kringle<br>Neur_chan_memb                |
| 304470_PRFO | XP_002587583.1 | 88 | Ldl_recept_a<br>VWA<br>Zona_pellucida                                                   | Ldl_recept_a<br>VWA<br>Zona_pellucida                          |
| 320550_PRFO | -              |    | Kringle<br>Kringle<br>Lectin_C<br>CUB<br>Lectin_C<br>MAM<br>Lectin_C<br>Kringle<br>SRCR |                                                                |
| 329690_PRFO | XP_002611153.1 | 90 | BTB<br>BTB<br>BACK<br>Kelch_1<br>Kelch_1<br>Kelch_1<br>Kelch_1                          | BTB<br>BTB<br>BACK<br>Kelch_1<br>Kelch_1<br>Kelch_1<br>Kelch_1 |
| 329890_PRFO | XP_002606025.1 | 77 | COR<br>Death                                                                            | COR<br>Death                                                   |

---

**Supplementary Table S3. Comparison of the domain architectures of proteins of *B. belcheri* selected from dataset *Branchiostoma.belcheri\_HapV2\_proteins.fa* (release 1) with those of their equivalents in the dataset *Branchiostoma.belcheri\_v15h11.r2\_protein.fa* (release 2) and dataset *Branchiostoma.belcheri\_v18h27.r3\_ref\_protein.fa* (release 3).** One hundred proteins of *B. belcheri*, containing at least two Pfam-A domains, were selected from release 1 and their matches were identified in release 2 and release 3. <sup>2</sup>Domain architecture (DA) is defined as the linear sequence of Pfam-A domains. Entries whose domain architecture is identical with those of orthologs in the high quality Swiss-Prot database are marked with an asterisk\*. Mispredicted entries with DA that deviates from those of orthologous Swiss-Prot entries are highlighted in bold underline. The data are arranged in two categories based on the presence or absence of orthologs in the Swiss-Prot database.

| Sequence ID<br>release 1                                | DA                                                                                       | Sequence ID<br>release 2 | DA                                                                                       | Sequence ID<br>release 3 | DA                                                                                       |
|---------------------------------------------------------|------------------------------------------------------------------------------------------|--------------------------|------------------------------------------------------------------------------------------|--------------------------|------------------------------------------------------------------------------------------|
| <b>Orthologs are present in the Swiss-Prot database</b> |                                                                                          |                          |                                                                                          |                          |                                                                                          |
| 001440_PFF0*                                            | P4Ha_N<br>2OG-FeII_Oxy_3                                                                 | <b><u>053450F.t1</u></b> | P4Ha_N                                                                                   | 089550F.t1*              | P4Ha_N<br>2OG-FeII_Oxy_3                                                                 |
| 002260_PFF0*                                            | Activin_recp<br>Pkinase_Tyr                                                              | 243600F.t1*              | Activin_recp<br>Pkinase_Tyr                                                              | 297980F.t2*              | Activin_recp<br>Pkinase_Tyr                                                              |
| 003500_PFF0*                                            | CLCA<br>VWA_2                                                                            | 041250R.t1*              | CLCA<br>VWA_2                                                                            | 265240R.t1*              | CLCA<br>VWA_2                                                                            |
| 003850_PFF0*                                            | Pep_M12B_propep<br>Reprolysin_5<br>Disintegrin                                           | <b><u>062250R.t1</u></b> | Reprolysin_5<br>Disintegrin                                                              | 095570F.t1*              | Pep_M12B_propep<br>Reprolysin_5<br>Disintegrin                                           |
| 012350_PFF0*                                            | Kazal_2<br>SPARC_Ca_bdg<br>Thyroglobulin_1                                               | 229830F.t1*              | Kazal_2<br>SPARC_Ca_bdg<br>Thyroglobulin_1                                               | 197610F.t1*              | Kazal_2<br>SPARC_Ca_bdg<br>Thyroglobulin_1                                               |
| 017590_PFF0*                                            | Cu-oxidase_3<br>Cu-oxidase_2<br>Cu-oxidase_2                                             | 002580R.t1*              | Cu-oxidase_3<br>Cu-oxidase_2<br>Cu-oxidase_2                                             | <b><u>204890R.t2</u></b> | Cu-oxidase_3<br>Cu-oxidase_2<br>Cu-oxidase_2<br>Cu-oxidase                               |
| 052490_PFF0*                                            | Fz<br>NTR                                                                                | 017500F.t1*              | Fz<br>NTR                                                                                | 127920R.t1*              | Fz<br>NTR                                                                                |
| <b><u>058270_PFF0</u></b>                               | I-set<br>Fz<br>Kringle                                                                   | 142670R.t2               | I-set<br>Fz<br>Kringle<br>I-set<br>Pkinase_Tyr                                           | 192300R.t2               | I-set<br>Fz<br>Kringle<br>I-set<br>Pkinase_Tyr                                           |
| 078830_PFF0*                                            | CPSase_L_chain<br>CPSase_L_D2<br>Biotin_carb_C<br>HMGL-like<br>PYC_OADA<br>Biotin_lipoyl | 097650F.t2*              | CPSase_L_chain<br>CPSase_L_D2<br>Biotin_carb_C<br>HMGL-like<br>PYC_OADA<br>Biotin_lipoyl | 252380R.t2*              | CPSase_L_chain<br>CPSase_L_D2<br>Biotin_carb_C<br>HMGL-like<br>PYC_OADA<br>Biotin_lipoyl |
| <b><u>080250_PFF0</u></b>                               | LRR_8<br>I-set<br>Wnt                                                                    | <b><u>001910R.t1</u></b> | Wnt                                                                                      | 062470F.t1*              | Wnt                                                                                      |

|                           |                                                                                                                            |                          | Wnt                                                                                                                          |                          |                                                                                                              |
|---------------------------|----------------------------------------------------------------------------------------------------------------------------|--------------------------|------------------------------------------------------------------------------------------------------------------------------|--------------------------|--------------------------------------------------------------------------------------------------------------|
| 091850_PFF0               | Gal_Lectin<br>OLF<br>HRM<br>GAIN<br><br>GPS<br>7tm_2                                                                       | <b><u>324940R.t1</u></b> | Gal_Lectin<br>OLF<br>HRM<br>GAIN<br>GAIN<br>GPS<br>7tm_2                                                                     | 191840R.t2               | Gal_Lectin<br>OLF<br>HRM<br>GAIN<br><br>GPS<br>7tm_2                                                         |
| 102470_PFF0*              | RNA_pol_Rpb2_1<br>RNA_pol_Rpb2_2<br>RNA_pol_Rpb2_3<br>RNA_pol_Rpb2_4<br>RNA_pol_Rpb2_5<br>RNA_pol_Rpb2_6<br>RNA_pol_Rpb2_7 | 010690R.t1*              | A_pol_Rpb2_1<br>A_pol_Rpb2_2<br>A_pol_Rpb2_3<br>A_pol_Rpb2_4<br>A_pol_Rpb2_5<br>A_pol_Rpb2_6<br>A_pol_Rpb2_7                 | 282790F.t1*              | A_pol_Rpb2_1<br>A_pol_Rpb2_2<br>A_pol_Rpb2_3<br>A_pol_Rpb2_4<br>A_pol_Rpb2_5<br>A_pol_Rpb2_6<br>A_pol_Rpb2_7 |
| <b><u>103400_PFF0</u></b> | Ank_3<br>Ank_2<br>Ank_4<br><br>Arm<br>Arm                                                                                  | <b><u>028040F.t1</u></b> | Ank_4<br>Ank_2<br>Arm<br>Arm                                                                                                 | <b><u>043790F.t1</u></b> | Ank_4<br>Ank_2<br>Arm<br>Arm                                                                                 |
| <b><u>114280_PFF0</u></b> | C2<br>C2<br>FerI<br>C2<br><br>FerB<br>C2<br>C2<br>C2<br>C2<br>Ferlin_C                                                     | 261060R.t1*              | C2<br>C2<br>FerI<br>C2<br>FerA<br>FerB<br>C2<br>C2<br>C2<br>C2<br>Ferlin_C                                                   | 167750F.t1*              | C2<br>C2<br>FerI<br>C2<br>FerA<br>FerB<br>C2<br>C2<br>C2<br>C2<br>Ferlin_C                                   |
| 117350_PFF0*              | TGFb_propeptide<br>TGF_beta                                                                                                | 099520R.t1*              | TGFb_propeptide<br>TGF_beta                                                                                                  | 195530R.t1*              | TGFb_propeptide<br>TGF_beta                                                                                  |
| 118940_PFF0*              | HAD_2<br>APH<br>Acyl-CoA_dh_N<br>Acyl-CoA_dh_M<br>Acyl-CoA_dh_1                                                            | 092840R.t1*              | HAD_2<br>APH<br>Acyl-CoA_dh_N<br>Acyl-CoA_dh_M<br>Acyl-CoA_dh_1                                                              | 003000F.t1*              | HAD_2<br>APH<br>Acyl-CoA_dh_N<br>Acyl-CoA_dh_M<br>Acyl-CoA_dh_1                                              |
| 123650_PFF0*              | CAP_GLY<br>Dynactin                                                                                                        | 265490R.t1*              | CAP_GLY<br>Dynactin                                                                                                          | 121780F.t5*              | CAP_GLY<br>Dynactin                                                                                          |
| <b><u>127590_PFF0</u></b> | Kazal_2<br>Kazal_2<br>Kazal_2<br>SEA<br><br>Kazal_2<br>Kazal_2<br>Kazal_2<br>SEA                                           | <b><u>303040R.t1</u></b> | Kazal_2<br>Kazal_2<br>Kazal_2<br>SEA<br>Kazal_2<br>Kazal_2<br>Kazal_2<br>Kazal_2<br>Kazal_1<br>Kazal_2<br>Kazal_2<br>Kazal_2 | 212090F.t4*              | Kazal_2<br>Kazal_2<br>Kazal_2<br>SEA                                                                         |

Kazal\_2  
Kazal\_2  
Kazal\_2  
Kazal\_1  
Kazal\_1  
Laminin\_EGF  
Laminin\_EGF

Kazal\_2  
Kazal\_2  
Kazal\_2  
Kazal\_1  
Kazal\_1  
Kazal\_1  
Laminin\_EGF  
Laminin\_EGF  
Kazal\_2  
EGF  
Laminin\_G\_1  
Laminin\_G\_1  
EGF  
Laminin\_G\_1

Kazal\_2  
Kazal\_2  
Kazal\_2  
Kazal\_1  
Kazal\_1  
Kazal\_1  
Laminin\_EGF  
Laminin\_EGF  
Kazal\_2  
EGF  
Laminin\_G\_1  
Laminin\_G\_1  
EGF  
Laminin\_G\_1

**127600\_PFF0**

**303040R.t1**

212090F.t4\*

Kazal\_2  
EGF  
Laminin\_G\_1  
Laminin\_G\_1  
EGF  
Laminin\_G\_1

Kazal\_2  
Kazal\_2  
Kazal\_2  
SEA  
Kazal\_2  
Kazal\_2  
Kazal\_2  
Kazal\_2  
Kazal\_1  
Kazal\_2  
Kazal\_2  
Kazal\_2  
SEA  
Kazal\_2  
Kazal\_2  
Kazal\_2  
Kazal\_1  
Kazal\_1  
Laminin\_EGF  
Laminin\_EGF  
Kazal\_2  
EGF  
Laminin\_G\_1  
Laminin\_G\_1  
EGF  
Laminin\_G\_1

Kazal\_2  
Kazal\_2  
Kazal\_2  
SEA  
Kazal\_2  
Kazal\_2  
Kazal\_2  
Kazal\_1  
Kazal\_1  
Laminin\_EGF  
Laminin\_EGF  
Kazal\_2  
EGF  
Laminin\_G\_1  
Laminin\_G\_1  
EGF  
Laminin\_G\_1

128050\_PFF0

TSP\_1  
  
Ldl\_recept\_a  
MACPF  
TSP\_1  
GCC2\_GCC3

013570R.t2

TSP\_1  
TSP\_1  
Ldl\_recept\_a  
MACPF  
TSP\_1  
GCC2\_GCC3

174680F.t1

TSP\_1  
TSP\_1  
Ldl\_recept\_a  
MACPF  
TSP\_1  
GCC2\_GCC3

133320\_PFF0

SRCR  
Kringle  
SRCR  
Trypsin

250080R.t1

SRCR  
Kringle  
SRCR  
Trypsin

228670R.t1

SRCR  
Kringle  
SRCR  
Trypsin

135460\_PFF0\*

Fz  
Frizzled

222910F.t1\*

Fz  
Frizzled

**019690R.t1**

Frizzled

**144220\_PFF0**

RICTOR\_N  
RICTOR\_M

**045000R.t1**

RCC1  
RCC1  
RCC1  
RCC1  
RICTOR\_N  
RICTOR\_M

**081090R.t3**

RCC1  
RCC1  
RCC1  
RCC1  
RICTOR\_N  
RICTOR\_M



|                           | RasGEF_N_2<br>RICTOR_V                                              |                          | RasGEF_N_2<br>RICTOR_V                                       |                          | RasGEF_N_2<br>RICTOR_V                                       |
|---------------------------|---------------------------------------------------------------------|--------------------------|--------------------------------------------------------------|--------------------------|--------------------------------------------------------------|
| 152200_PFF0*              | FHA<br>CEP170_C                                                     | <b><u>098310R.t1</u></b> | CEP170_C                                                     | 251720F.t1*              | FHA<br>CEP170_C                                              |
| 153460_PFF0*              | Ank_2<br>Ank_2<br>Ank_2<br>Ion_trans                                | 227850R.t1*              | Ank_2<br>Ank_2<br>Ank_2<br>Ion_trans                         | 004550F.t1*              | Ank_2<br>Ank_2<br>Ank_2<br>Ion_trans                         |
| 157010_PFF0*              | EF-hand_7<br>Ferric_reduct<br>FAD_binding_8<br>NAD_binding_6        | 030190R.t2*              | EF-hand_7<br>Ferric_reduct<br>FAD_binding_8<br>NAD_binding_6 | 276360F.t1*              | EF-hand_7<br>Ferric_reduct<br>FAD_binding_8<br>NAD_binding_6 |
| 157070_PFF0*              | ANAPC10<br>HECT                                                     | <b><u>030090R.t1</u></b> | ANAPC10<br>HECT<br>ANAPC10<br>HECT                           | 276460F.t1*              | ANAPC10<br>HECT                                              |
| 157720_PFF0               | HYR<br>GCC2_GCC3                                                    | 124730F.t1               | HYR<br>GCC2_GCC3                                             | <b><u>261920R.t2</u></b> | Troponin<br>HYR<br>GCC2_GCC3                                 |
| <b><u>158710_PFF0</u></b> | tRNA-synt_1<br>Anticodon_1<br>Val_tRNA-synt_C                       | <b><u>189810F.t1</u></b> | tRNA-synt_1<br>Anticodon_1                                   | <b><u>259960R.t1</u></b> | tRNA-synt_1<br>Anticodon_1                                   |
| 158830_PFF0*              | IGFBP<br>VWC<br>TSP_1                                               | 190070F.t1*              | IGFBP<br>VWC<br>TSP_1                                        | 259710R.t1*              | IGFBP<br>VWC<br>TSP_1                                        |
| 160400_PFF0               | Integrin_beta<br>Integrin_B_tail<br>Integrin_b_cyt                  | 100620R.t1               | Integrin_beta<br>Integrin_B_tail<br>Integrin_b_cyt           | 196660R.t1               | Integrin_beta<br>Integrin_B_tail<br>Integrin_b_cyt           |
| <b><u>161590_PFF0</u></b> | FERM_M<br>IRS<br>Talin_middle<br>I_LWEQ<br>VBS<br>VBS<br>I_LWEQ     | <b><u>181770F.t1</u></b> | FERM_M<br><br>Talin_middle<br>I_LWEQ<br>I_LWEQ<br>VBS<br>VBS | <b><u>085620R.t1</u></b> | FERM_M<br>IRS<br>Talin_middle<br>LWEQ                        |
| <b><u>161590_PFF0</u></b> | FERM_M<br><br>IRS<br>Talin_middle<br>I_LWEQ<br>VBS<br>VBS<br>I_LWEQ | <b><u>181780F.t1</u></b> | <br><br>I_LWEQ                                               | <b><u>085620R.t3</u></b> | <br><br>VBS<br>VBS                                           |
| 172520_PRF0*              | Fz<br>NTR                                                           | 078910F.t1*              | Fz<br>NTR                                                    | 190570F.t1*              | Fz<br>NTR                                                    |
| <b><u>185920_PRF0</u></b> | An_peroxidase<br><br>EGF_CA                                         | <b><u>262810R.t1</u></b> | An_peroxidase<br><br>EGF_CA                                  | 222960R.t1*              | An_peroxidase<br>Sushi<br>EGF_CA                             |



|                           |                                                                                   |                          |                                                                                    |                          |                                                                                            |
|---------------------------|-----------------------------------------------------------------------------------|--------------------------|------------------------------------------------------------------------------------|--------------------------|--------------------------------------------------------------------------------------------|
| <b><u>227800</u></b> PRF0 | SRCR<br>SRCR<br>SRCR<br>Lysyl_oxidase                                             | <b><u>010500R.t1</u></b> | SRCR<br>SRCR<br>SRCR<br>Lysyl_oxidase                                              | <b><u>283050F.t3</u></b> | SRCR<br>SRCR<br>SRCR<br>Lysyl_oxidase                                                      |
| <b><u>237250</u></b> PRF0 |                                                                                   | 111050F.t1*              | A2M_N<br>A2M_N_2<br>ANATO<br>A2M<br>Thiol-ester_cl<br>A2M_comp<br>A2M_recep<br>NTR | 171620R.t1*              | A2M_N<br>A2M_N_2<br>ANATO<br>A2M<br>Thiol-ester_cl<br>A2M_comp<br>A2M_recep<br>NTR         |
| <b><u>237260</u></b> PRF0 | A2M_N<br>A2M_N_2<br>ANATO<br>A2M<br>Thiol-ester_cl<br>A2M_comp                    | 111050F.t1*              | A2M_N<br>A2M_N_2<br>ANATO<br>A2M<br>Thiol-ester_cl<br>A2M_comp<br>A2M_recep<br>NTR | 171620R.t1*              | A2M_N<br>A2M_N_2<br>ANATO<br>A2M<br>Thiol-ester_cl<br>A2M_comp<br>A2M_recep<br>NTR         |
| 246010_PRFF0*             | PG_binding_1<br>Peptidase_M10<br>Hemopexin<br>Hemopexin<br>Hemopexin<br>Hemopexin | 098400F.t1*              | PG_binding_1<br>Peptidase_M10<br>Hemopexin<br>Hemopexin<br>Hemopexin<br>Hemopexin  | <b><u>217220R.t1</u></b> | PG_binding_1<br>Peptidase_M10<br>Hemopexin<br>Hemopexin<br>Hemopexin<br>Hemopexin<br>MFS_1 |
| 247370_PRFF0*             | WIF<br>Pkinase_Tyr                                                                | 113360F.t1*              | WIF<br>Pkinase_Tyr                                                                 | 045780R.t1*              | WIF<br>Pkinase_Tyr                                                                         |
| 248080_PRFF0              | EGF_3<br>Sushi<br>Sushi<br>VWA<br>Trypsin                                         | 073650R.t1               | EGF_3<br>Sushi<br>Sushi<br>VWA<br>Trypsin                                          | 246540R.t1               | EGF_3<br>Sushi<br>Sushi<br>VWA<br>Trypsin                                                  |
| 253950_PRFF0*             |                                                                                   | <b><u>290630R.t1</u></b> | Histone<br>RhoGEF<br>Histone<br>RhoGEF<br>PH<br>RasGEF_N<br>RasGEF                 | 135030R.t1*              | Histone<br>RhoGEF<br>PH<br>RasGEF_N<br>RasGEF                                              |
| 253960_PRFF0*             | zf-Sec23_Sec24<br>Sec23_trunk<br>Sec23_BS<br>Sec23_helical<br>Gelsolin            | 290640R.t1*              | zf-Sec23_Sec24<br>Sec23_trunk<br>Sec23_BS<br>Sec23_helical<br>Gelsolin             | 135040R.t1*              | zf-Sec23_Sec24<br>Sec23_trunk<br>Sec23_BS<br>Sec23_helical<br>Gelsolin                     |
| 254170_PRFF0*             | ABC_membrane<br>ABC_tran<br>ABC_membrane<br>ABC_tran                              | 154120R.t1*              | ABC_membrane<br>ABC_tran<br>ABC_membrane<br>ABC_tran                               | 026920R.t1*              | ABC_membrane<br>ABC_tran<br>ABC_membrane<br>ABC_tran                                       |
| <b><u>256520</u></b> PRF0 |                                                                                   | 044700R.t1*              | Myb_DNA-binding<br>SWIRM                                                           | 105830R.t1*              | Myb_DNA-binding<br>SWIRM                                                                   |

|                           | JAB                                                        |                          | JAB                                                                          |                          | JAB                                                        |
|---------------------------|------------------------------------------------------------|--------------------------|------------------------------------------------------------------------------|--------------------------|------------------------------------------------------------|
| <b><u>256530</u></b> PRF0 | Myb_DNA-binding<br>SWIRM                                   | 044700R.t1*              | Myb_DNA-binding<br>SWIRM<br>JAB                                              | 105830R.t1*              | Myb_DNA-binding<br>SWIRM<br>JAB                            |
| 257610_PRFO*              | EST1<br>EST1_DNA_bind<br>EST1_DNA_bind<br>PIN_4            | 174840F.t1*              | EST1<br>EST1_DNA_bind<br>EST1_DNA_bind<br>PIN_4                              | 039650R.t1*              | EST1<br>EST1_DNA_bind<br>EST1_DNA_bind<br>PIN_4            |
| <b><u>258810</u></b> PRF0 | Glyco_transf_29<br>Glyco_transf_29                         | <b><u>000220F.t1</u></b> | Glyco_transf_29<br>Glyco_transf_29                                           | 299600F.t1*              | Glyco_transf_29                                            |
| 258870_PRFO*              | STAT_int<br>STAT_alpha<br>STAT_bind<br>SH2                 | 049290R.t1*              | STAT_int<br>STAT_alpha<br>STAT_bind<br>SH2                                   | 154380F.t1*              | STAT_int<br>STAT_alpha<br>STAT_bind<br>SH2                 |
| 259020_PRFO*              | GRAM<br>GRAM<br>RabGAP-TBC                                 | 011870R.t1*              | GRAM<br>GRAM<br>RabGAP-TBC                                                   | 075250R.t1*              | GRAM<br>GRAM<br>RabGAP-TBC                                 |
| 272770_PRFO*              | AAA_11<br>AAA_11<br>AAA_12                                 | 091600R.t1*              | AAA_11<br>AAA_11<br>AAA_12                                                   | 182450R.t1*              | AAA_11<br>AAA_11<br>AAA_12                                 |
| 283240_PRFO               | Reeler<br>Spond_N<br>fn3<br>TSP_1<br>fn3<br>TSP_1<br>TSP_1 | 241240R.t1               | Reeler<br>Spond_N<br>fn3<br>TSP_1<br>fn3<br>TSP_1<br>TSP_1                   | 179850R.t1               | Reeler<br>Spond_N<br>fn3<br>TSP_1<br>fn3<br>TSP_1<br>TSP_1 |
| 293630_PRFO*              |                                                            | <b><u>312700R.t1</u></b> | TPR_12<br>TPR_12<br>TPR_7<br>TPR_12<br>TPR_7<br>TPR_12<br>Chorein_N<br>ATG_C | 110520R.t2*              | Chorein_N<br>ATG_C                                         |
| <b><u>293740</u></b> PRF0 |                                                            | <b><u>151150R.t1</u></b> | SHR-BD<br>VPS13_C<br>SHR-BD<br>VPS13_C                                       | <b><u>257130F.t1</u></b> | SHR-BD<br>VPS13_C                                          |
| <b><u>209920</u></b> PRM0 | UBA                                                        | <b><u>151150R.t1</u></b> |                                                                              | <b><u>257120F.t1</u></b> | UBA<br>UBA                                                 |
| <b><u>209940</u></b> PRF0 | Chorein_N<br>VPS13<br>VPS13_mid_rpt                        | <b><u>151170R.t1</u></b> | SHR-BD<br>VPS13_C<br>SHR-BD<br>VPS13_C<br><br>VPS13<br>VPS13_mid_rpt         | <b><u>257100F.t1</u></b> | VPS13<br>VPS13_mid_rpt                                     |
| 321850_PRFO*              | ANF_receptor<br>Lig_chan-Glu_bd<br>Lig_chan                | <b><u>030780R.t1</u></b> | Lig_chan-Glu_bd<br>Lig_chan                                                  | 275750F.t1*              | ANF_receptor<br>Lig_chan-Glu_bd<br>Lig_chan                |

|                           |                                                                                                                      |                          |                                                                                                                                              |                          |                                                                                 |
|---------------------------|----------------------------------------------------------------------------------------------------------------------|--------------------------|----------------------------------------------------------------------------------------------------------------------------------------------|--------------------------|---------------------------------------------------------------------------------|
| 319230_PRFO*              | cNMP_binding<br>DEP<br>cNMP_binding<br>RasGEF_N<br>RasGEF                                                            | <b><u>102020R.t1</u></b> | cNMP_binding<br>cNMP_binding<br>DEP<br>cNMP_binding<br><br>SEA<br>SEA                                                                        | 158680R.t1*              | cNMP_binding<br>DEP<br>cNMP_binding<br>RasGEF_N<br>RasGEF                       |
| 325460_PRFO               | FG-GAP<br>FG-GAP<br>Integrin_alpha2                                                                                  | 100710F.t1               | FG-GAP<br>FG-GAP<br>Integrin_alpha2                                                                                                          | 196740F.t1               | FG-GAP<br>FG-GAP<br>Integrin_alpha2                                             |
| <b><u>320370 PRFO</u></b> | zf-RING_5<br><br>zf-B_box<br>fn3<br>SPRY                                                                             | <b><u>145570R.t1</u></b> | zf-C3HC4_3<br>zf-B_box<br>fn3                                                                                                                | <b><u>031850F.t1</u></b> | zf-RING_5<br><br>zf-B_box<br>fn3                                                |
| 325780_PRFO*              | Glycos_transf_2<br>Ricin_B_lectin                                                                                    | <b><u>100260F.t1</u></b> | Glycos_transf_2<br>BACK<br>Glycos_transf_2<br>Ricin_B_lectin<br>Glycos_transf_2<br>Ricin_B_lectin                                            | <b><u>196320F.t1</u></b> | Glycos_transf_2<br>Ricin_B_lectin<br>Glycos_transf_2<br>Ricin_B_lectin          |
| <b><u>328450 PRFO</u></b> | Kunitz_BPTI<br>NTR                                                                                                   | 212930R.t1*              | WAP<br>Kazal_2<br>Kunitz_BPTI<br>Kunitz_BPTI<br>NTR                                                                                          | 040720F.t1*              | WAP<br>Kazal_2<br>Kunitz_BPTI<br>Kunitz_BPTI<br>NTR                             |
| <b><u>328460 PRFO</u></b> | WAP<br>Kazal_2<br>Kunitz_BPTI<br>Kunitz_BPTI                                                                         | 212930R.t1*              | WAP<br>Kazal_2<br>Kunitz_BPTI<br>Kunitz_BPTI<br>NTR                                                                                          | 040720F.t1*              | WAP<br>Kazal_2<br>Kunitz_BPTI<br>Kunitz_BPTI<br>NTR                             |
| <b><u>328470 PRFO</u></b> | ABC_membrane<br>ABC_tran<br>ABC_membrane<br>ABC_tran<br><br>ABC_membrane<br>ABC_tran<br><br>ABC_membrane<br>ABC_tran | <b><u>212960R.t3</u></b> | ABC_membrane<br>ABC_membrane<br>ABC_tran<br>ABC_membrane<br><br>ABC_membrane<br>ABC_membrane<br><br>ABC_membrane<br>ABC_membrane<br>ABC_tran | <b><u>040670F.t2</u></b> | ABC_membrane<br>ABC_tran<br>ABC_membrane<br><br>ABC_membrane                    |
| <b><u>328810 PRFO</u></b> | zf-HC5HC2H<br>FYRN<br>FYRC<br>FYRC<br>SET                                                                            | <b><u>279190F.t1</u></b> | zf-HC5HC2H<br>zf-HC5HC2H<br>PHD<br>PHD<br>PHD<br>PHD<br>zf-HC5HC2H<br>FYRN<br>FYRC<br><br>SET                                                | <b><u>172210F.t4</u></b> | zf-HC5HC2H<br>PHD<br>PHD<br>PHD<br>PHD<br>zf-HC5HC2H<br>FYRN<br>FYRC<br><br>SET |
| <b><u>328940 PRFO</u></b> | dsrcm                                                                                                                | <b><u>278970F.t1</u></b> | dsrcm                                                                                                                                        | <b><u>172050F.t2</u></b> |                                                                                 |

|              |                                                      |                          |                                                      |                          |                                                      |
|--------------|------------------------------------------------------|--------------------------|------------------------------------------------------|--------------------------|------------------------------------------------------|
|              | dsrm<br>A_deamin<br>A_deamin                         |                          | dsrm<br>A_deamin                                     |                          | dsrm<br>A_deamin                                     |
|              |                                                      |                          | adh_short                                            |                          |                                                      |
| 329040_PRFO* | Flavodoxin_1<br>FAD_binding_1<br>NAD_binding_1       | 278780F.t1*              | Flavodoxin_1<br>FAD_binding_1<br>NAD_binding_1       | 171870F.t1*              | Flavodoxin_1<br>FAD_binding_1<br>NAD_binding_1       |
| 329370_PRFO* | PLAT<br>Lipoxygenase                                 | <b><u>246260F.t1</u></b> | PLAT<br>Lipoxygenase<br>Lipoxygenase                 | 286940R.t1*              | PLAT<br>Lipoxygenase                                 |
| 329970_PRFO  | DAG_kinase_N<br>C1_1<br>C1_1<br>DAGK_cat<br>DAGK_acc | 242250R.t1               | DAG_kinase_N<br>C1_1<br>C1_1<br>DAGK_cat<br>DAGK_acc | 057640F.t1               | DAG_kinase_N<br>C1_1<br>C1_1<br>DAGK_cat<br>DAGK_acc |
| 330040_PRFO* | Activin_recp<br>Pkinase                              | 242390R.t1*              | Activin_recp<br>Pkinase                              | <b><u>057490F.t2</u></b> | Activin_recp<br>Pkinase<br>Activin_recp<br>Pkinase   |
| 330210_PRFO* | EF-hand_1<br>Mito_carr<br>Mito_carr<br>Mito_carr     | 242710R.t1*              | EF-hand_1<br>Mito_carr<br>Mito_carr<br>Mito_carr     | 057220F.t1*              | EF-hand_1<br>Mito_carr<br>Mito_carr<br>Mito_carr     |

### Orthologs are absent in the Swiss-Prot database

|             |                                                                                                 |            |                                                                                                        |            |                                                                                                        |
|-------------|-------------------------------------------------------------------------------------------------|------------|--------------------------------------------------------------------------------------------------------|------------|--------------------------------------------------------------------------------------------------------|
| 000200_PFF0 | V-set<br>CBM_14                                                                                 | 094410F.t1 | V-set<br>CBM_14                                                                                        | 144580F.t1 | V-set<br>CBM_14                                                                                        |
| 001280_PFF0 | CBM_14<br>ILEI                                                                                  | 259500R.t1 | CBM_14<br>ILEI                                                                                         | 169170F.t1 | CBM_14<br>ILEI                                                                                         |
| 017700_PFF0 | Gal_Lectin<br>Gal_Lectin<br>GPS<br>7tm_2                                                        | 002350R.t1 | zf-B_box<br>Gal_Lectin<br>Gal_Lectin<br>GPS<br>7tm_2                                                   | 204650R.t1 | zf-B_box<br>Gal_Lectin<br>Gal_Lectin<br>GPS<br>7tm_2                                                   |
| 018300_PFF0 | Lectin_C<br>fn2<br>fn2<br>fn2<br>fn2<br>fn2                                                     | 261420F.t1 | fn2<br>fn2<br>fn2                                                                                      | 222240F.t1 | Lectin_C<br>fn2<br>fn2<br>fn2<br>fn2<br>fn2                                                            |
| 040970_PFF0 | kringle<br>kringle<br>trypsin                                                                   | 236680F.t1 | kringle<br>kringle<br>trypsin                                                                          | 076590R.t1 | kringle<br>kringle<br>trypsin                                                                          |
| 068220_PFF0 | fn2<br>fn2<br>fn2<br>fn2<br>CUB<br>CUB                                                          | 288190R.t1 | fn2<br>fn2<br>fn2<br>fn2<br>CUB<br>CUB                                                                 | 100050R.t1 | fn2<br>fn2<br>fn2<br>fn2<br>CUB<br>CUB                                                                 |
| 080050_PFF0 | N-glycanase_N<br>N-glycanase_C                                                                  | 072890R.t1 | N-glycanase_N<br>N-glycanase_C                                                                         | 251010F.t1 | N-glycanase_N<br>N-glycanase_C                                                                         |
| 124390_PFF0 | cEGF<br>FXa_inhibition<br>EGF_CA<br>EGF_CA<br>NIDO<br><br>EGF_CA<br>EGF_CA<br><br>SEA<br>EGF_CA | 140980F.t1 | cEGF<br>FXa_inhibition<br>EGF_CA<br>EGF_CA<br>NIDO<br>VWD<br>EGF_CA<br>EGF_CA<br>cEGF<br>SEA<br>EGF_CA | 141260F.t1 | cEGF<br>FXa_inhibition<br>EGF_CA<br>EGF_CA<br>NIDO<br>VWD<br>EGF_CA<br>EGF_CA<br>cEGF<br>SEA<br>EGF_CA |
| 159900_PFF0 | AAA_8<br>MT<br>AAA_9<br><br>Dynein_heavy                                                        | 101480R.t1 | AAA_8<br>MT<br>AAA_9<br>AAA_9<br>Dynein_heavy                                                          | 158030R.t1 | AAA_8<br>MT<br>AAA_9<br>AAA_9<br>Dynein_heavy                                                          |
| 167280_PRF0 | Kringle<br>Somatomedin_B<br>7tm_2                                                               | 007220R.t1 | Kringle<br>Somatomedin_B<br>7tm_2                                                                      | 118250R.t1 | Kringle<br>Somatomedin_B<br>7tm_2                                                                      |
| 173360_PRF0 | Astacin<br>kringle                                                                              | 299040F.t1 | Astacin<br>kringle                                                                                     | 053640F.t1 | Astacin<br>kringle                                                                                     |

|             |                                                                                                     |            |                                                                                                        |            |                                                                                                        |
|-------------|-----------------------------------------------------------------------------------------------------|------------|--------------------------------------------------------------------------------------------------------|------------|--------------------------------------------------------------------------------------------------------|
| 180420_PRFO | Somatomedin_B<br>7tm_2                                                                              | 050300R.t1 | Somatomedin_B<br>7tm_2                                                                                 | 069800F.t1 | Somatomedin_B<br>7tm_2                                                                                 |
| 184730_PRFO | Ldl_recept_a<br>Kringle<br>Kringle<br><br>7tm_2                                                     | 002500F.t1 | Ldl_recept_a<br>Kringle<br>Kringle<br><br>7tm_2                                                        | 176740F.t1 | Ldl_recept_a<br>Ldl_recept_a<br>Kringle<br>Kringle<br>Somatomedin_B<br>7tm_2                           |
| 188610_PRFO | ASC<br>F5_F8_type_C<br>F5_F8_type_C<br>Kringle<br>ASC                                               | 021920R.t1 | ASC<br>F5_F8_type_C<br>F5_F8_type_C<br>Kringle<br>ASC                                                  | 155310R.t1 | ASC<br><br>F5_F8_type_C<br>Kringle<br>ASC                                                              |
| 196740_PRFO | Fibrinogen_C<br>Fibrinogen_C<br>I-set<br>fn3<br>fn3<br>fn3<br>fn3<br>Y_phosphatase<br>Y_phosphatase | 024030F.t2 | Fibrinogen_C<br>Fibrinogen_C<br>I-set<br>fn3<br>fn3<br>fn3<br>fn3<br>Y_phosphatase<br>Y_phosphatase    | 086240F.t1 | Fibrinogen_C<br>Fibrinogen_C<br>I-set<br>fn3<br>fn3<br>fn3<br>fn3<br>Y_phosphatase<br>Y_phosphatase    |
| 200810_PRFO | Astacin<br>CUB<br>MAM                                                                               | 016310R.t1 | Astacin<br>CUB<br>MAM                                                                                  | 104370F.t1 | Astacin<br>CUB<br>MAM                                                                                  |
| 258300_PRFO | Ldl_recept_a<br>SRCR<br>Ldl_recept_a<br>Trypsin                                                     | 060660R.t1 | SRCR<br>Kringle<br>Kringle<br>Ldl_recept_a<br>PAN_1<br>Ldl_recept_a<br>SRCR<br>Ldl_recept_a<br>Trypsin | 006090R.t1 | SRCR<br>Kringle<br>Kringle<br>Ldl_recept_a<br>PAN_1<br>Ldl_recept_a<br>SRCR<br>Ldl_recept_a<br>Trypsin |
| 260260_PRFO | BACK<br>Kelch_1                                                                                     | 162090R.t1 | BACK<br>Kelch_1                                                                                        | 152800F.t1 | BACK<br>Kelch_1                                                                                        |
| 269420_PRFO | CUB<br>Ldl_recept_a<br>Fz<br>Kringle<br>Neur_chan_memb                                              | 303590R.t1 | Death<br>CUB<br>CUB<br>Ldl_recept_a<br>Fz<br>Kringle<br>Neur_chan_memb                                 | 009080F.t1 | Death<br>CUB<br>CUB<br>Ldl_recept_a<br>Fz<br>Kringle<br>Neur_chan_memb                                 |
| 304470_PRFO | Ldl_recept_a<br>VWA<br>Zona_pellucida                                                               | 092860F.t1 | Ldl_recept_a<br>VWA<br>Zona_pellucida                                                                  | 002980R.t1 | Ldl_recept_a<br>VWA<br>Zona_pellucida                                                                  |
| 320550_PRFO | Kringle<br>Kringle<br>Lectin_C<br>CUB<br>Lectin_C<br>MAM                                            | 145290F.t1 | Lectin_C<br>MAM                                                                                        | 009580R.t1 | Kringle<br>Kringle<br>Lectin_C<br>CUB<br>Lectin_C<br>MAM                                               |



|             | Lectin_C<br>Kringle<br>SRCR                                    |            | Lectin_C<br>Kringle<br>SRCR                                    |            | Lectin_C<br>Kringle<br>SRCR                                    |
|-------------|----------------------------------------------------------------|------------|----------------------------------------------------------------|------------|----------------------------------------------------------------|
| 329690_PRFO | BTB<br>BTB<br>BACK<br>Kelch_1<br>Kelch_1<br>Kelch_1<br>Kelch_1 | 245850F.t1 | BTB<br>BTB<br>BACK<br>Kelch_1<br>Kelch_1<br>Kelch_1<br>Kelch_1 | 287390R.t1 | BTB<br>BTB<br>BACK<br>Kelch_1<br>Kelch_1<br>Kelch_1<br>Kelch_1 |
| 329890_PRFO | COR<br>Death                                                   | 047410F.t1 | COR<br>Death                                                   | 173700F.t1 | Death                                                          |

---
